# Supplementary material
Source: PubMed Central journal article supplement (PMC3064265)
Supplement: NIHMS252278-supplement-1.pdf [file NIHMS252278-supplement-1.pdf]

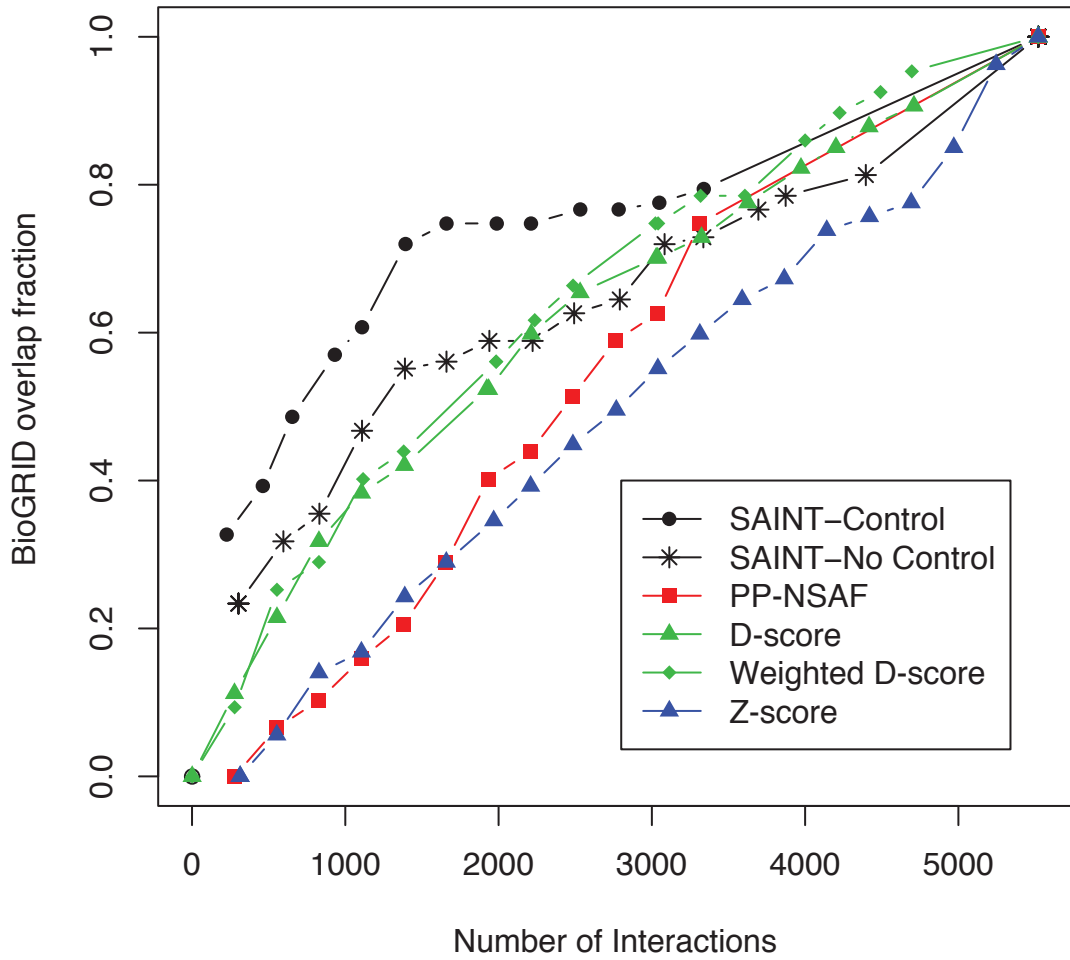

Supplementary Figure 1. Literature overlap in TIP49 dataset. SAINT was applied with and without control purification data.
